# Supplementary material
Source: Royal Society of Chemistry journal article supplement (doi:10.1039/d5lc01173f)
Supplement: d5lc01173f1.pdf [file d5lc01173f1.pdf]

# Dynamic biomimicry in skin-on-a-chip: Multi-scale construction to translational dermatology, drug screening and cosmetic evaluation

*Linwei Sang,<sup>†</sup> Ajing Liu,<sup>†</sup> Haochen Wang, Wanyi Li, Qin Tu\* and Jinyi Wang\**

College of Chemistry and Pharmacy, Northwest A&F University, Yangling, Shaanxi 712100, P. R. China

E-mail: [tuqin@nwsuaf.edu.cn](mailto:tuqin@nwsuaf.edu.cn), [jywang@nwsuaf.edu.cn](mailto:jywang@nwsuaf.edu.cn)

**Table S1.** Summary of representative skin-on-a-chip studies across different dynamic levels

| Model type /dynamic level                      | Cells        | Matrix / scaffold                       | Materials            | Flow rates                                                                                                                             | Culture duration                                        | Throughput                           | Barrier Metrics                                                                                             | Primary application                              | Limitations / future need                                                                                                                                                                                                                         | Ref. |
|------------------------------------------------|--------------|-----------------------------------------|----------------------|----------------------------------------------------------------------------------------------------------------------------------------|---------------------------------------------------------|--------------------------------------|-------------------------------------------------------------------------------------------------------------|--------------------------------------------------|---------------------------------------------------------------------------------------------------------------------------------------------------------------------------------------------------------------------------------------------------|------|
| Dynamic barrier (Epidermis)                    | NHKs         | PET membrane                            | PMMA                 | Medium flow 1 $\mu\text{L}/\text{min}$ ; air flow 1 $\mu\text{L}/\text{min}$ ; shear stress $3 \times 10^{-4} \text{ dyn}/\text{cm}^2$ | 2 d submerged + 14 d ALI; monitored to 21 d ALI         | 24-unit chip                         | TEER; Cascade Blue/Texas Red permeability; epidermal differentiation markers                                | Irritation testing; Barrier function             | Epidermis-only model with limited multicellular complexity; flow profile and shear stress require further investigation, and more sophisticated biomimetic models with additional irritation biomarkers are needed.                               | 1    |
| Dynamic barrier (Epidermis)                    | HaCaT        | Col I + sponge scaffold                 | PDMS + PMMA          | 41.67 $\mu\text{L}/\text{h}$ submerged; 30 $\mu\text{L}/\text{h}$ lower-channel perfusion during ALI                                   | 7 d submerged + 35 d ALI                                | Single unit                          | H&E-based stratification and stratum corneum; no TEER/permeability                                          | Barrier function; Tissue engineering             | Mainly demonstrated culture feasibility and epidermal morphology; no clear advantage was observed for low-density 2D submerged cultures, and further validation of functional barrier readouts and broader cell/tissue applications is needed.    | 2    |
| Dynamic barrier (Epidermis)                    | HaCaT        | PET membrane                            | PDMS                 | NR                                                                                                                                     | 15 d for permeation assay; 5 d for viability assay      | 24-site format                       | FITC-dextran permeability across HaCaT monolayer                                                            | Drug permeation / PK; Irritation testing         | Limited to a HaCaT monolayer-based barrier without full epidermal differentiation; long-term culture robustness and cell-layer integrity need improvement for more reliable kinetic permeation assays.                                            | 3    |
| Dynamic barrier (Epidermis); with pigmentation | NHKs + NHMs  | PET membrane                            | PMMA                 | Medium flow 1 $\mu\text{L}/\text{min}$ ; air flow 1 $\mu\text{L}/\text{min}$                                                           | 2 d submerged + 14 d ALI                                | 3-unit chip                          | Cascade Blue/Texas Red permeability; prednisone acetate permeation; ZO-1/differentiation markers            | Barrier function; Cosmetic safety                | Epidermis-based model remains limited in multicellular tissue complexity; broader validation with more chemicals, inter-laboratory testing, and expanded high-throughput formats is needed for pharmaceutical and cosmetic applications.          | 4    |
| Dynamic mechanics (Full-thickness)             | HEKs + HDFs  | PS scaffold + fibroblast-derived matrix | polycarbonate + PDMS | Dermal perfusion 1.5 $\mu\text{L}/\text{min}$ ; epidermal perfusion 2 $\mu\text{L}/\text{min}$ ; air flow 1.5 $\mu\text{L}/\text{min}$ | 6 d dermis + 2 d submerged + 11 d ALI                   | Single unit                          | TEER; FITC-dextran permeability; epidermal stratification and barrier function                              | Barrier function; Drug testing                   | Dermal maturation and FDM deposition require careful optimization to avoid keratinocyte infiltration or channel clogging; future work should integrate additional cell types and expand disease- or patient-specific validation.                  | 5    |
| Dynamic mechanics (Full-thickness)             | HEKs + HDFs  | PS scaffold + fibroblast-derived matrix | PS + PDMS            | All at 1.5 $\mu\text{L}/\text{min}$                                                                                                    | 12 d dermis + 2 d submerged + up to 14 d ALI            | Single unit                          | TEER; lucifer yellow penetration                                                                            | Barrier function; Irritation testing             | Mainly validated as a proof-of-concept barrier-sensing platform; TEER sensitivity depends on electrode geometry and chamber design, and broader validation with diverse barrier tissues and testing scenarios is needed.                          | 6    |
| Dynamic mechanics (Full-thickness)             | HaCaT + HDFs | Fibrin gel + PC membrane                | vinyl + PMMA + PDMS  | lower-channel flow 40 $\mu\text{L}/\text{h}$ ; keratinocyte seeding 50 $\mu\text{L}/\text{min}$                                        | 24 h fibroblast spreading + 6 h keratinocyte attachment | Single unit                          | Multilayer tissue formation and cell viability by fluorescence/confocal imaging; no TEER/permeability assay | Tissue engineering; Multilayer tissue generation | Proof-of-concept platform mainly demonstrates multilayer tissue generation rather than mature skin barrier function; further epidermal maturation, functional readouts, and mechanical stimulation strategies are needed.                         | 7    |
| Dynamic mechanics (Full-thickness)             | HEKs + HDFs  | Col I + PET membrane                    | PDMS                 | Gravity-driven rocker flow; average shear stress $\sim 0.06 \text{ Pa}$                                                                | 3 d dermis + 3 d submerged + 11 d ALI                   | 24-unit plate; scalable to 128 units | TEER; dextran permeability; LOR and collagen IV staining                                                    | Barrier function; Toxicity screening             | Highly scalable platform, but TEER sensitivity remains non-uniform and requires further optimization of electrode integration, frequency range, and electrode geometry; tissue-specific maturation and application validation should be expanded. | 8    |

| Model type /dynamic level                        | Cells                                                                      | Matrix / scaffold                       | Materials                         | Flow rates                                                                                                                           | Culture duration                                                   | Throughput  | Barrier Metrics                                                                                                    | Primary application                                | Limitations / future need                                                                                                                                                                                                                                                                                                                          | Ref. |
|--------------------------------------------------|----------------------------------------------------------------------------|-----------------------------------------|-----------------------------------|--------------------------------------------------------------------------------------------------------------------------------------|--------------------------------------------------------------------|-------------|--------------------------------------------------------------------------------------------------------------------|----------------------------------------------------|----------------------------------------------------------------------------------------------------------------------------------------------------------------------------------------------------------------------------------------------------------------------------------------------------------------------------------------------------|------|
| Dynamic mechanics (Full-thickness)               | HaCaT + fibroblasts                                                        | Col I + PET membrane                    | PDMS                              | Medium flow 1 $\mu\text{L}/\text{min}$ ; air flow 1 $\mu\text{L}/\text{min}$ ; shear stress $3 \times 10^{-4} \text{ dyn}/\text{cm}$ | 2 d submerged + day 3–16 ALI                                       | Single unit | TEER; fluorescent molecule permeability; stratum corneum thickness; collagen IV/FLG/LOR                            | Inflammation / infection; Drug efficacy            | The platform remains based on a simplified HaCaT/fibroblast collagen model and a P. acnes/SLS-induced injury setting; future work should incorporate more native skin cell types, optimize dermal stiffness, and expand multi-chamber or high-throughput drug-screening validation.                                                                | 9    |
| Dynamic mechanics (Full-thickness); with stretch | HEKs + HDFs                                                                | Col I                                   | PDMS                              | 10 $\mu\text{L}/\text{min}$ ; tensile stimulation: 0.01 Hz, 5.3 mm/min                                                               | 28 d                                                               | Single unit | H&E morphology and barrier-related proteins; no TEER/permeability assay                                            | Mechanobiology; Wound-healing-like modeling        | Mainly demonstrates tensile-stimulation-induced skin responses rather than a validated disease or drug-testing model; loading parameters and long-term tissue damage need further optimization for damaged-barrier or wound-healing applications.                                                                                                  | 10   |
| Dynamic mechanics (Full-thickness); with stretch | HEKs + HDFs                                                                | Col I + sulfo-SANPAH                    | PDMS                              | Gravity-driven operation; mechanical stimulation: 5% compressive strain @ 0.01 Hz, 12 h on/12 h off                                  | 5 d dermis + 3 d epidermis + 28 d ALI/mechanical aging             | Single unit | H&E epidermal thickness and COL4A/fibronectin/FLG/K10/IVL markers; no TEER/permeability assay                      | Skin aging model; Cosmetic evaluation              | The ageing model remains simpler than native skin because it is limited by current fibroblast–keratinocyte co-culture conditions; future studies should add immune cells, capillaries, peripheral nerves, hair follicles, and sweat glands for more physiologically complete ageing models.                                                        | 11   |
| Dynamic mechanics (Full-thickness); with stretch | HEKs + HDFs                                                                | Col I + porous membrane                 | PDMS                              | NR; Stretching: 10% strain @ 0.01 or 0.05 Hz; 12 h/day                                                                               | 4 d fibroblasts + 4 d keratinocytes + 7 d ALI/stretch              | Single unit | H&E morphology, stratum corneum thinning, and collagen IV/fibronectin/K10 markers; no TEER/permeability assay      | Anti-wrinkle evaluation; Mechanobiology            | The model establishes wrinkle-like morphology under rapid cyclic stretching but remains an early ageing-mimic platform; stretch frequency and strain require careful optimization because higher-frequency stimulation can damage epidermal and dermal structures.                                                                                 | 12   |
| Dynamic mechanics (Full-thickness); with stretch | HEKs + HDFs + HUVECs                                                       | Col I with hollow vascular channels     | PDMS + Ecoflex + 3D-printed resin | Perfusion 2–3 mL/h; Stretching: 10% strain @ 0.05 Hz                                                                                 | 2 d dermis + 2 d endothelialization + 3 d ALI + 4 d stretch        | Single unit | Epidermal capacitance measurement; epidermal thickness/stratification; collagen IV and Ki67 staining               | Mechanobiology; Transdermal testing                | Mainly demonstrates that combined perfusion and dynamic stretching can improve skin-equivalent morphology; further optimization of perfusion/stretching parameters and validation of barrier function, disease modelling, and drug-testing applications are needed.                                                                                | 13   |
| Dynamic circulation (immune)                     | Dermal fibroblasts + HUVECs + M1/M2 macrophages                            | Matrigel + collagen/fibronectin coating | PDMS                              | NR                                                                                                                                   | 24-48 h                                                            | Single unit | NR                                                                                                                 | Wound healing; Immune response modeling            | The model captures the paracrine component of early wound inflammation but does not reconstruct a full-thickness epidermal barrier or all wound-healing stages; future work should incorporate additional cell types and extend the platform to later proliferation and remodelling phases                                                         | 14   |
| Dynamic circulation (Vascularized & immune)      | HDFs + HaCaT + HUVECs + HL-60                                              | Col I + porous membrane                 | PDMS                              | 10 $\mu\text{L}/\text{min}$                                                                                                          | 7 d dermis + 3 d HaCaT stabilization + 7–10 d differentiation      | Single unit | Epidermal differentiation: K5/FLG; endothelial barrier: 70 kDa FITC-dextran permeability and CD31                  | Immune response modeling; Irritation testing       | The vascularized skin chip recapitulates leukocyte recruitment after UV stimulation, but vascular permeability was higher than in Transwell and endothelial differentiation was partly affected by chip culture conditions; further optimization of medium compatibility, endothelial stability, and disease-specific immune validation is needed. | 15   |
| Dynamic circulation (Vascularized & immune)      | HEKs + HDFs + dermal microvascular endothelial cells + primary neutrophils | Col I                                   | PMMA/glass                        | Gravity-driven microvascular perfusion; flow rate NR                                                                                 | 2 d endothelialization + 2 d keratinocyte confluence + 7–10 d ALI; | Single unit | Epidermal markers: K14/K10/FLG/LOR/IVL; endothelial barrier: 40 kDa FITC-dextran permeability and CD31/VE-cadherin | Inflammation / infection; Immune response modeling | The model is limited by mixed-origin commercial primary cells and lacks skin-resident immune components; next-generation platforms should use autologous cellular components and incorporate tissue-resident immune cells to model adaptive immunity and personalized HSV responses.                                                               | 16   |

| Model type /dynamic level                   | Cells                                                        | Matrix / scaffold                              | Materials | Flow rates                               | Culture duration                                   | Throughput  | Barrier Metrics                                                                                                                       | Primary application                                   | Limitations / future need                                                                                                                                                                                                                                                                                                         | Ref. |
|---------------------------------------------|--------------------------------------------------------------|------------------------------------------------|-----------|------------------------------------------|----------------------------------------------------|-------------|---------------------------------------------------------------------------------------------------------------------------------------|-------------------------------------------------------|-----------------------------------------------------------------------------------------------------------------------------------------------------------------------------------------------------------------------------------------------------------------------------------------------------------------------------------|------|
| Dynamic circulation (Vascularized & immune) | HEKs + HDFs + HUVECs + HL-60                                 | Porous scaffold + Col I                        | NR        | Gravity-driven perfusion; flow rate NR   | Long-term ALI culture                              | Single unit | No TEER/permeability assay; stratum corneum/epidermal thickness and FLG/IVL/LOR markers; CD31/CD144 and microsphere perfusion         | Inflammation / immune response modeling; Drug testing | Although the platform improves contraction control and vascularized AD-like modelling, pericyte incorporation, stepwise higher-shear maturation, broader cytokeratin/stromal marker panels, and validation with primary immune subsets and disease-specific therapeutic benchmarks are still needed.                              | 17   |
| Dynamic circulation (Vascularized)          | HaCaT + HS27 + HUVECs                                        | Fibronectin-coated PET membranes (0.4 $\mu$ m) | PDMS      | Gravity-driven perfusion; flow rate NR   | 3 d to confluence; up to 3 weeks culture stability | Single unit | Endothelial barrier: ZO-1 and 4 kDa FITC-dextran permeability                                                                         | Inflammation / infection; Drug testing                | The model simulates TNF- $\alpha$ -induced inflammation and edema but remains based on simplified monolayer cell layers using HaCaT, fibroblasts, and HUVECs; future work should improve epidermal maturation, immune-cell integration, and broader drug or irritant validation.                                                  | 18   |
| Dynamic circulation (Vascularized)          | HDFs + HEKs / HaCaT; HUVECs                                  | Col I + PC membrane                            | PDMS      | Gravity-driven perfusion; 10 $\mu$ L/min | 5-7 d fibroblasts + 2 d keratinocytes + 5-10 d ALI | Single unit | H&E stratification and K5/IVL/FLG markers; no TEER/permeability assay                                                                 | Barrier function; Tissue engineering                  | Mainly establishes on-chip skin construction and perfusion-dependent cell viability; collagen contraction, gel thickness-dependent nutrient limitation, and lack of immune-function validation remain to be further improved for physiological skin modelling.                                                                    | 19   |
| Dynamic circulation (Vascularized)          | HaCaT + Hs27 fibroblasts + HUVECs                            | Porous membranes                               | PDMS      | Gravity-driven perfusion; flow rate NR   | 3 d to confluence + 42 h post-exposure             | Single unit | MTT viability and ZO-1 tight-junction ratio; no TEER/permeability assay                                                               | Irritation testing; Toxicity screening                | The dual-parameter model improves irritation prediction by combining cell viability and endothelial tight-junction disruption, but validation remains limited to 20 reference substances; more chemicals, human patch-test datasets, and standardized inter-laboratory testing are needed.                                        | 20   |
| Dynamic circulation (Vascularized)          | HDFs + HEKs + HUVECs                                         | Fibrin gel                                     | PDMS      | NR                                       | 6 d total (2 d pre-culture + 4 d treatment)        | Single unit | Claudin-1/K14 and live/dead staining for keratinocyte integrity; no TEER/permeability assay                                           | Irritation testing; Cosmetic safety                   | Proof-of-concept irritation model based on angiogenic responses rather than a mature full-thickness epidermal barrier; broader validation with diverse irritants, allergens, corrosives, and standardized quantitative biomarkers is needed for cosmetics and drug-safety testing.                                                | 21   |
| Dynamic circulation (Vascularized)          | N/TERT keratinocytes + HCA2 fibroblasts + HUVECs + pericytes | Fibrin + Col I/Matrigel                        | PDMS      | NR                                       | 4 d vascularization + 14 d skin culture            | Single unit | No TEER/permeability assay; epidermal stratification and laminin 332/K14/IVL/TGM1 markers; 70 kDa FITC-dextran vascular perfusability | Drug testing; Vascularized skin equivalent            | The model improves vascularized skin-equivalent construction, but epidermal maturation under ALI remains limited and the tissue is less stratified than native skin; future work should optimize nutrient transport, topical/systemic delivery assays, and scalable multi-chip formats for higher-throughput therapeutic testing. | 22   |
| Systemic dynamics (Multi-organ)             | HEKs + hNSC-derived neurons / hiPSC-HEPs                     | Col I                                          | PDMS      | NR                                       | 3 d stabilization + ALI to day 7                   | 6-unit chip | Cornified epidermis with IVL/CK10/CK5 markers; no TEER/permeability assay                                                             | Toxicity screening; multi-organ toxicity              | The platform enables skin-nerve and skin-liver coupling, but remains a proof-of-concept system with a simplified epidermal barrier and limited test compounds; broader chemical validation, quantitative barrier/permeation assessment, and standardized screening workflows are needed.                                          | 23   |

| Model type /dynamic level       | Cells                                                  | Matrix / scaffold          | Materials   | Flow rates                                         | Culture duration                                    | Throughput  | Barrier Metrics                                                                                                          | Primary application                              | Limitations / future need                                                                                                                                                                                                                                                                   | Ref. |
|---------------------------------|--------------------------------------------------------|----------------------------|-------------|----------------------------------------------------|-----------------------------------------------------|-------------|--------------------------------------------------------------------------------------------------------------------------|--------------------------------------------------|---------------------------------------------------------------------------------------------------------------------------------------------------------------------------------------------------------------------------------------------------------------------------------------------|------|
| Systemic dynamics (Multi-organ) | iPSC-cardiomyocytes + primary hepatocytes              | Strat-M membrane           | PMMA + PDMS | Rocker-driven; flow rate NR                        | Acute 3 d; chronic topical 10 d                     | Single unit | Strat-M membrane drug permeation by LC-MS/MS; no living skin barrier metrics                                             | Drug permeation/PK; multi-organ toxicity         | The system links dermal absorption to heart–liver toxicity, but uses a synthetic Strat-M skin surrogate rather than a living skin equivalent; future work should incorporate biological skin barriers, skin heterogeneity, and broader pharmacokinetic validation of topical drug delivery. | 24   |
| Systemic dynamics (Multi-organ) | Caco-2 + HEKs + gut microbes                           | PET membrane + PC membrane | PC          | Gravity-driven perfusion; 15° tilt, 500 s interval | 14 d gut differentiation + skin ALI differentiation | Single unit | Gut barrier: TEER, 70 kDa FITC-dextran permeability, and ZO-1; reconstructed epidermis: H&E and K5/IVL/FLG/Ki67 markers. | Gut–skin axis modeling; Inflammation / infection | The chip captures gut microbiota–skin crosstalk, but relies on Caco-2 cells and lacks immune components; future iterations should incorporate primary or patient-derived intestinal/skin cells, immune cells, and broader microbiome or disease-specific validation.                        | 25   |
| Systemic dynamics (Multi-organ) | <i>Ex vivo</i> human epidermis + KGN or TM3 aggregates | <i>Ex vivo</i> epidermis   | PDMS        | NR                                                 | 48 h aggregate formation + 24 h stimulation         | Single unit | H&E epidermal structure and stratum corneum thickness; no TEER/permeability assay                                        | Cosmetic safety; Hormone crosstalk model         | Sex-hormone regulation is modelled mainly through local hormone gradients without vascular delivery, limiting systemic hormone distribution and vascular–epidermal interactions; future work should incorporate vascular structures and broader donor or hormone-condition validation.      | 26   |

PMMA: polymethyl methacrylate; PDMS: polydimethylsiloxane; PS: polystyrene; PC: polycarbonate; PET: polyethylene terephthalate; HEKs: human epidermal keratinocytes; HDFs: human dermal fibroblasts; HUVECs: human umbilical vein endothelial cells; Col I: type I collagen; ALI: air-liquid interface; TEER: transepithelial electrical resistance; FLG: filaggrin; IVL: involucrin; LOR: lorixin; NR: not reported.

## References

1. J. Zhang, Z. Chen, Y. Zhang, X. Wang, J. Ouyang, J. Zhu, Y. Yan, X. Sun, F. Wang, X. Li, H. Ye, S. Sun, Q. Yu, J. Sun, J. Ge, Q. Li, Q. Han, Y. Pu and Z. Gu, *Lab Chip*, 2021, **21**, 3804-3818.
2. Q. Lang, Y. Ren, Y. Wu, Y. Guo, X. Zhao, Y. Tao, J. Liu, H. Zhao, L. Lei and H. Jiang, *Rsc Adv*, 2016, **6**, 27183-27190.
3. N. Sasaki, K. Tsuchiya and H. Kobayashi, *Sensor Mater*, 2019, **31**, 107-115.
4. Q. Li, C. Wang, X. Li, J. Zhang, Z. Zhang, K. Yang, J. Ouyang, S. Zha, L. Sha, J. Ge, Z. Chen and Z. Gu, *J Tissue Eng*, 2023, **14**, 1-13.
5. P. C. A. Zoio, S. Lopes-Ventura and A. Oliva, *Micro*, 2022, **2**, 191-211.
6. P. Zoio, S. Lopes-Ventura and A. Oliva, *Micromachines-Basel*, 2021, **12**, 20.
7. L. Valencia, V. Canalejas-Tejero, M. Clemente, I. Fernaud, M. Holgado, J. L. Jorcano and D. Velasco, *Sci Rep-Uk*, 2021, **11**, 13160.
8. H. T. Nguyen, S. L. Rissanen, M. Peltokangas, T. Laakkonen, J. Kettunen, L. Barthod, R. Sivakumar, A. Palojärvi, P. Junttila, J. Talvitie, M. Bassis, S. L. Nickels, S. Kalvala, P. Ilina, P. I. Tammela, S. Lehtonen, J. C. Schwamborn, S. Mosser and P. Singh, *Tissue Barriers*, 2024, **12**, 2315702.
9. Q. Quan, D. Weng, X. Li, Q. An, Y. Yang, B. Yu, Y. Ma and J. Wang, *Front Bioeng Biotech*, 2022, **10**, 13.
10. K. Kim, S. Jeong and G. Y. Sung, *Biochip J*, 2022, **16**, 501-514.
11. S. Jeong, J. Kim, H. M. Jeon, K. Kim and G. Y. Sung, *International Journal of Molecular Sciences*, 2021, **22**, 12788.
12. H. Y. Lim, J. Kim, H. J. Song, K. Kim, K. C. Choi, S. Park and G. Y. Sung, *J Ind Eng Chem*, 2018, **68**, 238-245.
13. N. Mori, Y. Morimoto and S. Takeuchi, *Biofabrication*, 2019, **11**, 11001.
14. S. Biglari, T. Y. L. Le, R. P. Tan, S. G. Wise, A. Zambon, G. Codolo, M. De Bernard, M. Warkiani, A. Schindeler, S. Naficy, P. Valtchev, A. Khademhosseini and F. Dehghani, *Adv Healthc Mater*, 2019, **8**, e1801307.
15. B. S. Kwak, S. P. Jin, S. J. Kim, E. J. Kim, J. H. Chung and J. H. Sung, *Biotechnol Bioeng*, 2020, **117**, 1853-1863.
16. S. Sun, L. Jin, Y. Zheng and J. Zhu, *Nat Commun*, 2022, **13**, 15.
17. K. Kim, H. Jang, E. Kim, H. Kim and G. Y. Sung, *Lab Chip*, 2025, **25**, 5936-5949.
18. M. Wufuer, G. Lee, W. Hur, B. Jeon, B. J. Kim, T. H. Choi and S. Lee, *Sci Rep-Uk*, 2016, **6**, 37471.
19. S. Lee, S. P. Jin, Y. K. Kim, G. Y. Sung, J. H. Chung and J. H. Sung, *Biomed Microdevices*, 2017, **19**, 22.
20. B. Jeon, G. Lee, M. Wufuer, Y. Huang, Y. Choi, S. Kim and T. H. Choi, *Toxicol in Vitro*, 2020, **68**, 104955.
21. N. Jusoh, J. Ko and N. L. Jeon, *Apl Bioeng*, 2019, **3**, 36101.
22. C. F. E. Jones, S. Di Cio, J. T. Connelly and J. E. Gautrot, *Front Bioeng Biotech*, 2022, **10**, 915702.
23. J. S. Lee, J. Kim, B. Cui, S. K. Kim, S. A. Cho, S. An and S. W. O. Cho, *Lab Chip*, 2022, **22**, 343-353.
24. C. P. Pires De Mello, C. Carmona-Moran, C. W. McAleer, J. Perez, E. A. Coln, C. J. Long, C. Oleaga, A. Riu, R. Note, S. Teissier, J. Langer and J. J. Hickman, *Lab Chip*, 2020, **20**, 749-759.
25. B. Ko, J. Son, J. In Won, B. M. Kang, C. W. Choi, R. Kim and J. H. Sung, *Lab Chip*, 2025, **25**, 2609-2619.
26. X. Wu, Y. Zhang, Y. Xu, X. Cao and Y. Zhao, *Bioact Mater*, 2025, **53**, 240-252.
